# Supplementary material for: Ten-Year Probabilities of Death Due to Cancer and Cardiovascular Disease among Breast Cancer Patients Diagnosed in North-Eastern Spain
Source: MDPI journal article supplement (doi:10.3390/ijerph20010405), 2022-12-27
Supplement: s1 [file s1]

# Ten-Year Probabilities of Death Due to Cancer and Cardiovascular Disease among Breast Cancer Patients Diagnosed in North-Eastern Spain

Ramon Clèries <sup>1,2,3,\*</sup>, Alberto Ameijide <sup>4</sup>, Maria Buxó <sup>5</sup>, Mireia Vilardell <sup>6</sup>, José Miguel Martínez <sup>7,8</sup>, Rebeca Font <sup>1,2</sup>, Rafael Marcos-Gragera <sup>5,9,10,11</sup>, Montse Puigdemont <sup>9</sup>, Gemma Viñas <sup>12</sup>, Marià Carulla <sup>4</sup>, Josep Alfons Espinàs <sup>1,2</sup>, Jaume Galceran <sup>4</sup>, Ángel Izquierdo <sup>9,12</sup> and Josep Maria Borràs <sup>1,2,3</sup>

<sup>1</sup> Pla Director d'Oncologia, Av Gran Vía 199-203, 08908 L'Hospitalet de Llobregat, Barcelona, Spain

<sup>2</sup> Bellvitge Biomedical Research Institute, IDIBELL, Av. Gran Via de l'Hospitalet, 199-203-1a planta, 08908 L'Hospitalet de Llobregat, Barcelona, Spain

<sup>3</sup> Clinical Sciences Department, Universitat de Barcelona, 08907 Barcelona, Spain

<sup>4</sup> Tarragona Cancer Registry, Epidemiology and Cancer Prevention Service, Hospital Universitari Sant Joan de Reus, IISPV, 43204 Reus, Spain

<sup>5</sup> Girona Biomedical Research Institute, IDIBGI, C/Dr. Castany s/n, Edifici M2, Parc Hospitalari Martí i Julià, 17190 Salt, Spain

<sup>6</sup> Independent Researcher, 08700 Barcelona, Spain

<sup>7</sup> Statistics and Operational Research Department, Universitat Politècnica de Catalunya, EDIFICI H, Diagonal 647, 08028 Barcelona, Spain

<sup>8</sup> Public Health Research Group, University of Alicante, 03690 Alicante, Spain

<sup>9</sup> Girona Cancer Registry, Epidemiology Unit, Pla Director d'Oncologia, Institut Català d'Oncologia, Group for Descriptive Epidemiology, Genetics and Cancer Prevention, Girona-IDIBGI, 17005 Girona, Spain

<sup>10</sup> Medical School, Universitat de Girona (UdG), 17071 Girona, Spain

<sup>11</sup> Epidemiology and Public Health Research Network Centre (CIBERESP), 28029 Madrid, Spain

<sup>12</sup> Medical Oncology Service, Catalan Institute of Oncology, Hospital Universitari de Girona "Doctor Josep Trueta", 17005 Girona, Spain

\* Correspondence: r.cleries@iconcologia.net; Tel.: +34-93-260-74-17

## WinBUGS Code for calculating SMR

```
Model
{
  # Obs: refers to O as it appears in the paper
  # Esp: refers to E as it appears in the paper
  # Likelihood

  Obs ~ dpois(mu)

  theta~dnorm(0,tau.theta)

  log(mu)<-log(Esp)+theta

  SMR <- exp(theta)

  pp.SMR<-step(SMR-1)

  sigma.theta~dunif(1,5)

  tau.a<-1/pow(sigma.theta,2)

}
```

**Supplementary Table S1.** Comparison of the standardized mortality ratios for cancer mortality in the cohort of patients diagnosed during 2000-2004 versus the cohort of patients diagnosed during 2005-2009.

| Cause                          | -----Cohort 2000-2004---- |      |                  |                   | -----Cohort 2005-2009---- |      |                  |                   | Ratio                               |                    |
|--------------------------------|---------------------------|------|------------------|-------------------|---------------------------|------|------------------|-------------------|-------------------------------------|--------------------|
|                                | O <sub>1</sub>            | %    | SMR <sub>1</sub> | P <sub>SMR1</sub> | O <sub>2</sub>            | %    | SMR <sub>2</sub> | P <sub>SMR2</sub> | SMR <sub>2</sub> / SMR <sub>1</sub> | P <sub>Ratio</sub> |
| <b>Tumours (except breast)</b> | 95                        | 28.2 | 1.34             | 0.98              | 101                       | 27.7 | 1.24             | 0.97              | 0.92                                | 0.22               |
| Lip, oral cavity & pharynx     | 2                         | 0.6  | 2.33             | 0.79              | 1                         | 0.3  | 1.42             | 0.49              | 0.61                                | 0.29               |
| Stomach                        | 7                         | 2.1  | 1.65             | 0.87              | 5                         | 1.4  | 1.05             | 0.49              | 0.64                                | 0.22               |
| Colon                          | 14                        | 4.1  | 1.45             | 0.89              | 14                        | 3.8  | 1.14             | 0.65              | 0.79                                | 0.35               |
| Rectum                         | 3                         | 0.9  | 1.02             | 0.43              | 2                         | 0.6  | 0.96             | 0.38              | 0.94                                | 0.45               |
| Liver & biliary tract          | 5                         | 1.5  | 1.38             | 0.71              | 5                         | 1.4  | 1.51             | 0.77              | 1.09                                | 0.93               |
| Pancreas                       | 7                         | 2.1  | 1.41             | 0.78              | 10                        | 2.7  | 1.38             | 0.81              | 0.98                                | 0.48               |
| Other digestive tumours        | 1                         | 0.3  | 0.38             | 0.07              | 2                         | 0.6  | 0.70             | 0.22              | 1.84                                | 0.71               |
| Larynx                         | 1                         | 0.3  | 3.45             | 0.75              | 1                         | 0.3  | 5.02             | 0.82              | 1.46                                | 0.87               |
| Trachea, bronchus & lung       | 9                         | 2.7  | 1.54             | 0.87              | 12                        | 3.3  | 1.35             | 0.82              | 0.88                                | 0.39               |
| Bone & articular cartilages    | 1                         | 0.3  | 5.53             | 0.84              | 1                         | 0.3  | 3.63             | 0.76              | 0.66                                | 0.11               |
| Skin & soft tissues            | 1                         | 0.3  | 0.70             | 0.23              | 1                         | 0.3  | 0.94             | 0.34              | 1.34                                | 0.81               |
| Cervix uteri                   | 1                         | 0.3  | 0.49             | 0.13              | 1                         | 0.3  | 0.74             | 0.25              | 1.51                                | 0.83               |
| Endometrial (Corpus uteri)     | 9                         | 2.7  | 3.23             | 0.99              | 8                         | 2.2  | 2.52             | 0.99              | 0.78                                | 0.21               |
| Ovary                          | 6                         | 1.8  | 1.50             | 0.79              | 8                         | 2.2  | 1.93             | 0.96              | 1.29                                | 0.69               |
| Other genital female organs    | 0                         | 0.0  | 0.00             | 0.37              | 1                         | 0.3  | 0.94             | 0.34              | -                                   | 0.44               |
| Kidney, except renal pelvis    | 1                         | 0.3  | 0.43             | 0.10              | 3                         | 0.8  | 1.98             | 0.81              | 4.60                                | 0.85               |
| Urinary bladder                | 1                         | 0.3  | 0.31             | 0.04              | 3                         | 0.8  | 1.61             | 0.72              | 5.19                                | 0.87               |
| Urinary tract                  | 0                         | 0.0  | 0.00             | 0.27              | 1                         | 0.3  | 1.59             | 0.53              | -                                   | 0.57               |
| Encephalon                     | 2                         | 0.6  | 0.89             | 0.34              | 5                         | 1.4  | 1.82             | 0.86              | 2.04                                | 0.84               |
| Other neuro/endocrine          | 1                         | 0.3  | 1.53             | 0.52              | 1                         | 0.3  | 1.24             | 0.44              | 0.81                                | 0.15               |
| Haematol. (non-leukaemia)      | 5                         | 1.5  | 1.05             | 0.49              | 7                         | 1.9  | 1.39             | 0.77              | 1.32                                | 0.69               |
| Leukemia                       | 6                         | 1.8  | 2.04             | 0.92              | 5                         | 1.4  | 1.70             | 0.83              | 0.83                                | 0.38               |
| Other and unknown              | 12                        | 3.6  | 1.50             | 0.89              | 3                         | 0.8  | 0.90             | 0.34              | 0.60                                | 0.17               |

**SMR<sub>1</sub>**: standardized mortality ratio for patients diagnosed during 2000-2004; **P**: probability; **SMR<sub>2</sub>**: standardized mortality ratio for patients diagnosed during 2005-2009;

**Supplementary Table S2.** Standardized mortality ratios for cardiovascular mortality in the cohort of patients diagnosed during 2000-2004 and 2005-2009.

|                                            | <u>Cohort 2000-2004</u> |      |                  |                   | <u>Cohort 2005-2009</u> |      |                  |                   |
|--------------------------------------------|-------------------------|------|------------------|-------------------|-------------------------|------|------------------|-------------------|
|                                            | (O <sub>1</sub> )       | (%)  | SMR <sub>1</sub> | P <sub>SMR1</sub> | (O <sub>2</sub> )       | (%)  | SMR <sub>2</sub> | P <sub>SMR2</sub> |
| <b>Circulatory system diseases (O=106)</b> | 112                     | 33.2 | 1.13             | 0.90              | 106                     | 29.0 | 1.32             | 0.99              |
| Chronic rheumatic heart diseases           | 3                       | 0.9  | 1.35             | 0.75              | 2                       | 0.5  | 1.25             | 0.65              |
| Hypertensive diseases                      | 9                       | 2.7  | 0.79             | 0.14              | 8                       | 2.1  | 0.72             | 0.15              |
| Acute myocardial infarction                | 17                      | 5.0  | 1.46             | 0.81              | 13                      | 3.4  | 1.36             | 0.84              |
| Other ischemic diseases of the heart       | 17                      | 5.0  | 1.39             | 0.74              | 12                      | 3.1  | 0.99             | 0.49              |
| Heart failure                              | 18                      | 5.3  | 1.65             | 0.91              | 23                      | 6.0  | 1.94             | 0.99              |
| Other heart diseases                       | 23                      | 6.8  | 1.24             | 0.88              | 28                      | 7.3  | 1.72             | 0.99              |
| Cerebrovascular diseases                   | 16                      | 4.7  | 0.61             | 0.25              | 15                      | 3.9  | 0.59             | 0.06              |
| Atherosclerosis                            | 4                       | 1.2  | 1.67             | 0.78              | 2                       | 0.5  | 1.60             | 0.71              |
| Other diseases of blood vessels            | 5                       | 1.5  | 0.99             | 0.48              | 3                       | 0.8  | 0.84             | 0.38              |

**SMR<sub>1</sub>**: standardized mortality ratio for patients diagnosed during 2000-2004; **P<sub>SMR1</sub>**: probability SMR<sub>1</sub>

**SMR<sub>2</sub>**: standardized mortality ratio for patients diagnosed during 2005-2009; **P<sub>SMR2</sub>**: probability SMR<sub>2</sub>

**Supplementary Table S3.1.** Ten year probabilities of death and their corresponding 95% confidence interval according to age and hormone receptor status among patients diagnosed in Stage I.

| Age   |             | PBC                | PCa              | PCVD              | POC               | Total                |
|-------|-------------|--------------------|------------------|-------------------|-------------------|----------------------|
| Years |             | (%, 95%CI)         | (%, 95%CI)       | (%, 95%CI)        | (%, 95%CI)        | (%, 95%CI)           |
| ≤49   | HR+         | 1.81 (0.35; 3.31)  | 3.71 (1.62;5.77) | 1.21 (0.24;2.29)  | 3.31 (1.24;5.17)  | 10.04 (6.91;13.11)   |
|       | HR-         | 9.71 (6.76;12.68)  | 3.72 (1.27;5.39) | 0.61 (0.05;1.31)  | 3.40 (1.18;5.63)  | 17.44 (14.01;20.82)  |
|       | Ratio (+/-) | 5.36 (2.29; 7.79)  | 1.00 (0.01;1.95) | 0.50 (0.00;1.03)  | 1.03 (0.25;1.97)  | 1.74 (1.25;2.95)     |
|       |             |                    |                  |                   |                   |                      |
| 50-68 | HR+         | 1.71 (0.58;2.93)   | 3.64 (1.61;5.69) | 1.42 (0.37;2.31)  | 3.21 (1.35;5.29)  | 9.98 (5.92;12.93)    |
|       | HR-         | 10.42 (7.35;13.62) | 4.42 (1.57;6.21) | 0.41 (0.01;1.17)  | 2.71 (1.28;4.02)  | 17.96 (14.23; 21.03) |
|       | Ratio (+/-) | 6.09 (2.08;10.14)  | 1.21 (0.27;2.19) | 0.29 (0.01; 1.21) | 0.84 (0.07; 1.69) | 1.80 (1.39; 3.01)    |
|       |             |                    |                  |                   |                   |                      |
| ≥69   | HR+         | 1.71 (0.48;2.89)   | 4.11 (3.71;5.43) | 1.31 (0.26; 2.24) | 3.12 (1.18; 5.46) | 10.25 (7.07; 13.01)  |
|       | HR-         | 10.82 (7.28;13.59) | 3.33 (1.28;5.24) | 0.12 (0.01; 1.03) | 2.71 (1.29; 4.06) | 16.98 (13.24; 20.97) |
|       | Ratio (+/-) | 6.33 (1.91; 9.83)  | 0.81 (0.05;1.51) | 0.09 (0.01; 1.09) | 0.87 (0.09; 1.78) | 1.66 (1.21; 2.85)    |

**Supplementary Table S3.2.** Ten year probabilities of death and their corresponding 95% confidence interval according to age and hormone receptor status among patients diagnosed in Stage II.

| Age   |             | PBC                 | PCa              | PCVD              | POC               | Total                |
|-------|-------------|---------------------|------------------|-------------------|-------------------|----------------------|
| Years |             | (%, 95%CI)          | (%, 95%CI)       | (%, 95%CI)        | (%, 95%CI)        | (%, 95%CI)           |
| ≤49   | HR+         | 9.31 (6.35; 12.32)  | 2.51 (1.42;5.37) | 3.23 (1.21;5.23)  | 5.14 (3.24;7.15)  | 20.19 (16.91;24.11)  |
|       | HR-         | 15.12 (12.76;18.67) | 2.61 (1.17;4.39) | 3.34 (1.05;5.51)  | 3.32 (1.12;5.36)  | 24.39 (18.01;30.81)  |
|       | Ratio (+/-) | 1.62 (2.29; 7.79)   | 1.04 (0.01;1.95) | 1.03 (0.00;1.03)  | 0.65 (0.25;1.97)  | 1.21 (1.02;1.81)     |
|       |             |                     |                  |                   |                   |                      |
| 50-68 | HR+         | 9.01 (6.51;12.91)   | 2.04 (1.01;3.07) | 3.01 (1.35;4.32)  | 5.01 (3.35;7.21)  | 19.07 (15.94;22.92)  |
|       | HR-         | 14.11 (10.35;18.52) | 2.82 (1.17;3.99) | 3.86 (1.01;5.17)  | 2.43 (1.25;4.15)  | 23.22 (18.23; 28.10) |
|       | Ratio (+/-) | 1.53 (0.89;2.64)    | 1.21 (0.15;2.08) | 1.17 (0.51; 1.79) | 0.48 (0.04; 1.49) | 1.16 (1.06; 1.83)    |
|       |             |                     |                  |                   |                   |                      |
| ≥69   | HR+         | 9.61 (6.43;12.39)   | 2.41 (1.71;3.43) | 3.41 (1.22; 5.12) | 4.42 (2.11; 6.53) | 19.85 (16.07; 21.54) |
|       | HR-         | 14.65 (10.18;18.99) | 2.72 (1.25;3.21) | 3.71 (1.58; 5.33) | 2.51 (1.39; 4.17) | 23.59 (21.91; 26.07) |
|       | Ratio (+/-) | 1.52 (1.01; 2.26)   | 1.13 (0.41;1.81) | 1.09 (0.35; 1.79) | 0.57 (0.14; 1.76) | 1.19 (1.02; 2.74)    |

**Supplementary Table S3.3.** Ten year probabilities of death and their corresponding 95% confidence interval according to age and hormone receptor status among patients diagnosed in Stage III.

| Age   |             | PBC                 | PCa               | PCVD              | POC               | Total                |
|-------|-------------|---------------------|-------------------|-------------------|-------------------|----------------------|
| Years |             | (%, 95%CI)          | (%, 95%CI)        | (%, 95%CI)        | (%, 95%CI)        | (%, 95%CI)           |
| ≤49   | HR+         | 32.21 (30.17;34.96) | 2.91(0.91;4.86)   | 3.23 (1.21; 4.27) | 3.75 (1.22; 4.78) | 42.10 (35.41; 49.12) |
|       | HR-         | 53.34 (43.19;64.01) | 1.23 (0.35;2.31)  | 3.31 (2.11; 4.14) | 3.52 (2.45; 4.51) | 61.40 (51.7; 72.91)  |
|       | Ratio (+/-) | 1.66 (1.05; 1.97)   | 0.42 (0.03;1.01)  | 1.02 (0.85;1.35)  | 0.94 (0.45;1.35)  | 1.41 (1.12; 1.77)    |
|       |             |                     |                   |                   |                   |                      |
| 50-68 | HR+         | 32.99 (23.87;42.58) | 2.91 (0.87;3.94)  | 3.11 (1.21; 2.33) | 3.82 (2.25;4.88)  | 42.83 (31.81; 49.03) |
|       | HR-         | 49.94 (38.77;59.24) | 0.94 (0.17; 1.75) | 3.31 (1.48;4.72)  | 2.84 (1.65; 3.47) | 57.03 (50.19;60.83)  |
|       | Ratio (+/-) | 1.51 (1.01;1.99)    | 0.32 (0.01; 1.09) | 1.06 (0.63; 2.25) | 0.74 (0.26; 1.23) | 1.33 (1.05; 1.71)    |
|       |             |                     |                   |                   |                   |                      |
| ≥69   | HR+         | 32.91 (22.90;42.93) | 3.11 (1.01; 4.97) | 3.11 (0.96; 5.08) | 4.28 (2.99; 5.73) | 43.41 (35.17; 52.12) |
|       | HR-         | 52.15 (44.32;61.03) | 0.54 (0.01; 2.38) | 3.25 (0.99; 5.27) | 2.77 (1.18; 3.97) | 58.71 (49.37;68.74)  |
|       | Ratio (+/-) | 1.58 (1.03;1.97)    | 0.17 (0.02; 1.02) | 1.05 (0.73; 2.18) | 0.65 (0.34; 1.16) | 1.38 (0.98; 1.81)    |

**Supplementary Table S3.4.** Ten year probabilities of death and their corresponding 95% confidence interval according to age and hormone receptor status among patients diagnosed in Stage IV.

| Age   | HR          | PBC                  | PCa                 | PCVD              | POC               | Total                 |
|-------|-------------|----------------------|---------------------|-------------------|-------------------|-----------------------|
| Years |             | (%, 95%CI)           | (%, 95%CI)          | (%, 95%CI)        | (%, 95%CI)        | (%, 95%CI)            |
| ≤49   | HR+         | 70.31 (63.37; 77.93) | 12.43 (7.63; 17.29) | 3.16 (1.14; 5.19) | 3.39 (1.19; 5.17) | 89.29 (79.26; 99.18)  |
|       | HR-         | 87.35 (79.72;96.01)  | 5.57 (1.65; 9.63)   | 3.33 (1.31; 5.28) | 1.44 (0.63; 2.25) | 97.69 (87.63; 100.00) |
|       | Ratio (+/-) | 1.24 (1.05; 1.57)    | 0.45 (0.01; 1.96)   | 1.05 (0.54; 1.85) | 0.42 (0.05; 0.98) | 1.09 (0.92; 1.98)     |
|       |             |                      |                     |                   |                   |                       |
| 50-68 | HR+         | 72.61 (62.87; 81.62) | 12.22 (5.93; 19.86) | 3.43 (1.12; 5.82) | 2.76 (1.26; 4.23) | 91.02 (81.01; 100.0)  |
|       | HR-         | 86.82 (76.94; 95.99) | 5.56 (1.23; 9.28)   | 3.85 (1.26; 5.93) | 1.15 (0.63; 2.17) | 97.38 (87.34; 100.0)  |
|       | Ratio (+/-) | 1.20 (1.01; 1.47)    | 0.45 (0.01; 1.83)   | 1.12 (0.73; 1.49) | 0.42 (0.15; 1.35) | 1.07 (0.65; 1.89)     |
|       |             |                      |                     |                   |                   |                       |
| ≥69   | HR+         | 70.61 (60.94; 77.63) | 13.76 (6.83; 20.06) | 2.84 (1.73; 3.92) | 4.75 (2.25; 6.96) | 91.96 (85.37; 97.26)  |
|       | HR-         | 87.14 (80.19; 95.03) | 5.21 (1.27; 8.99)   | 3.43 (0.91; 5.99) | 2.12 (1.01; 3.09) | 97.90 (89.99; 100.0)  |
|       | Ratio (+/-) | 1.23 (1.1; 1.56)     | 0.38 (0.01; 1.54)   | 1.21 (0.25; 1.99) | 0.45 (0.12; 1.25) | 1.10 (0.95; 100.0)    |



**Supplementary Table S4.** Causes of death in Catalonia among women during the period 2010-2019.

| <b>Cause of Death</b>                               | <b>(N)</b> | <b>(%)</b> |
|-----------------------------------------------------|------------|------------|
| Infectious and parasitic diseases                   | 93         | 1.5        |
| Tumours (including BC)                              | 1410       | 22.2       |
| Diseases of the blood and the hematopoietic organs  | 40         | 0.6        |
| Endocrine, nutritional and metabolic diseases       | 244        | 3.9        |
| Mental and behavioural disorders                    | 543        | 8.6        |
| Diseases of the nervous system/organs of the senses | 548        | 8.6        |
| Cardiovascular disease / Circulatory system         | 1735       | 27.3       |
| Diseases of the respiratory system                  | 606        | 9.6        |
| Diseases of the digestive system                    | 308        | 4.9        |
| Diseases of the skin and subcutaneous tissue        | 23         | 0.4        |
| Musculoskeletal system and connective tissue        | 164        | 2.6        |
| Diseases of the genitourinary system                | 239        | 3.8        |
| Congenital malformations                            | 12         | 0.2        |
| Symptoms, signs and abnormal findings               | 160        | 2.5        |
| External causes of mortality                        | 219        | 3.4        |
| Total                                               | 6344       | 100.0      |

N: annual average of the number of deaths; (%): percentage.

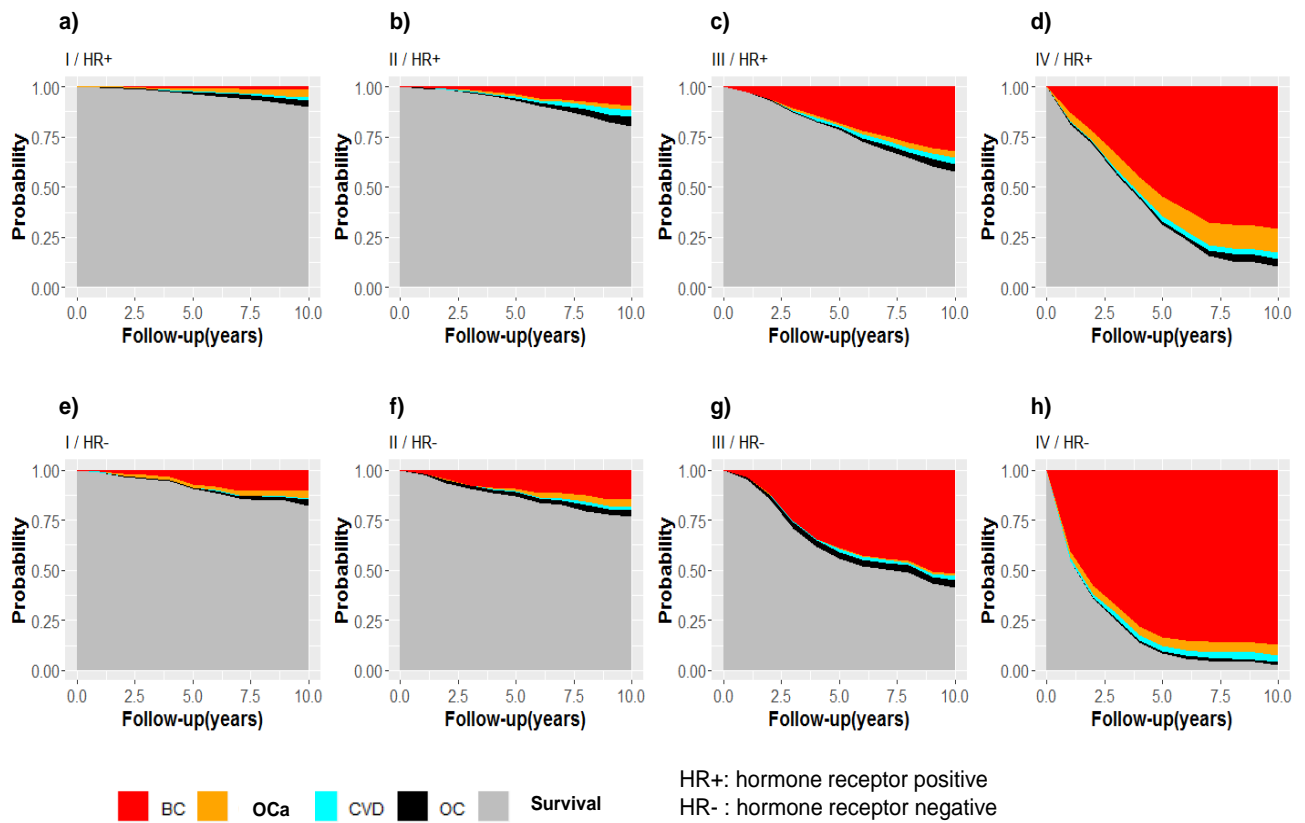

**Supplementary Figure S1.** Age-adjusted cumulative cause-specific mortality and survival probabilities accross stages of breast cancer at diagnosis and stratifying according to hormone receptor status. (Note: labelling on the panels represent “Stage: from I to IV / Hormone Receptor status: + or -”).

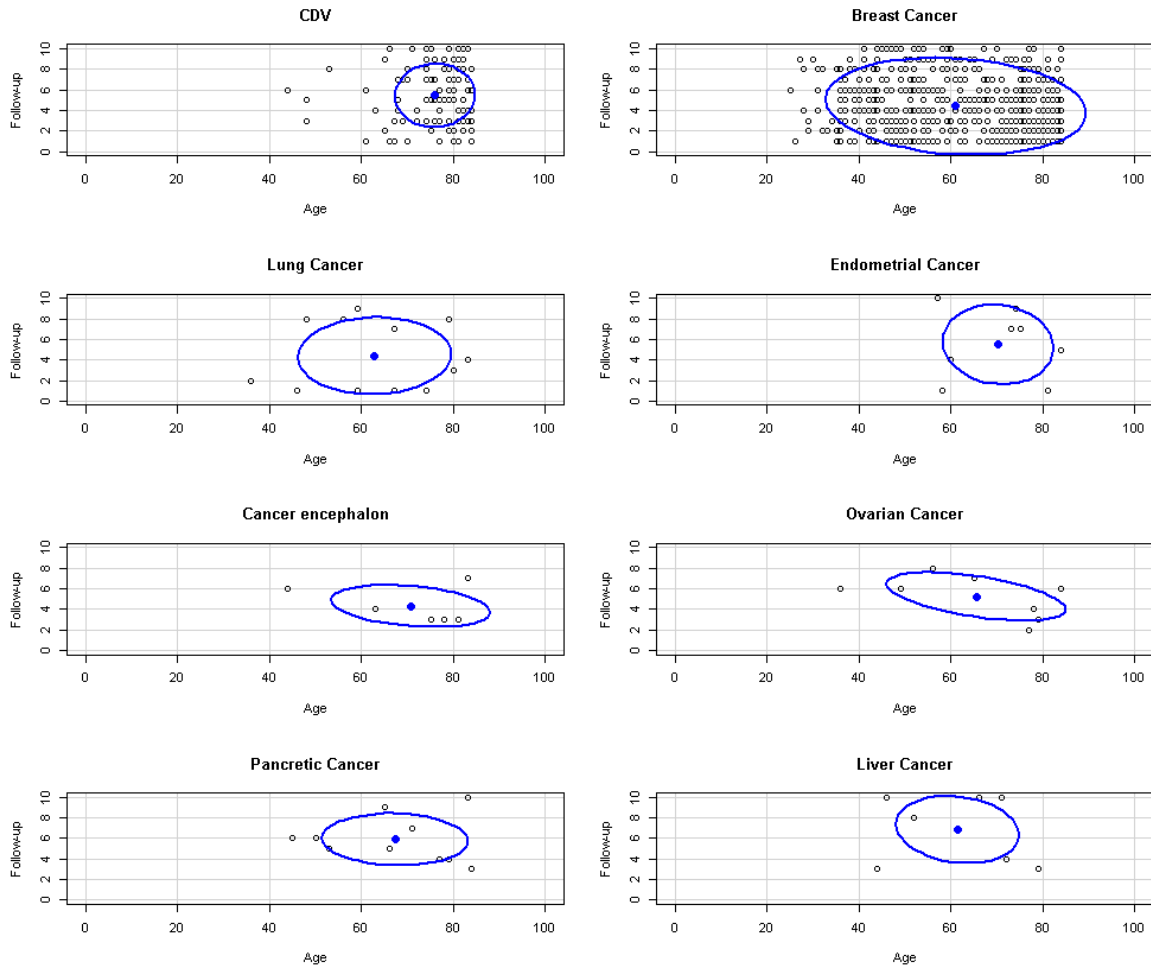

**Supplementary Figure S2.** Ellipses representing the 95% confidence interval for the age at diagnosis of BC versus the number of years to develop/die from a certain disease (follow-up) for the significant causes of death.

**Interpretation:** For CVD as the cause of death, the blue point represents the centroid of the 95% joint confidence interval for age and follow-up. This centroid is located beyond 70 years of age (X axis) and 6 years of follow-up. The interpretation is that patients diagnosed of BC who died from CVD were diagnosed beyond 70 years of age (in average) and developed/died from a CVD 6 years after have been diagnosed of BC.
